# Supplementary material for: Structural and biological insights into Klebsiella pneumoniae surface polysaccharide degradation by a bacteriophage K1 lyase: implications for clinical use
Source: PubMed Central journal article supplement (PMC8822698; doi:10.1186/s12929-022-00792-4), 2022-02-07
Supplement: 12929_2022_792_MOESM1_ESM.pdf [file 12929_2022_792_MOESM1_ESM.pdf]

# Supplementary Information

## **Structural and biological insights into *Klebsiella pneumoniae* surface polysaccharide degradation by a bacteriophage K1 lyase: implications for clinical use**

I-Fan Tu<sup>1†</sup>, Tzu-Lung Lin<sup>2†</sup>, Feng-Ling Yang<sup>1</sup>, I-Ming Lee<sup>1</sup>, Wei-Lin Tu<sup>1</sup>, Jiahn-Haur Liao<sup>1</sup>, Tzu-Ping Ko<sup>1</sup>, Wen-Jin Wu<sup>1</sup>, Jia-Tsong Jan<sup>3</sup>, Meng-Ru Ho<sup>1</sup>, Ching-Yi Chou<sup>1</sup>, Andrew H.-J. Wang<sup>1</sup>, Chung-Yi Wu<sup>3</sup>, Jin-Town Wang<sup>2</sup>, Kai-Fa Huang<sup>1\*</sup> and Shih-Hsiung Wu<sup>1,4\*</sup>

<sup>1</sup>Institute of Biological Chemistry, Academia Sinica, Taipei 115, Taiwan

<sup>2</sup>Department of Microbiology, National Taiwan University Hospital, Taipei 100, Taiwan

<sup>3</sup>Genomics research center, Academia Sinica, Taipei 115, Taiwan

<sup>4</sup>Department of Chemistry, National Taiwan University, Taipei 106, Taiwan

\*Correspondence: [huangkf@gate.sinica.edu.tw](mailto:huangkf@gate.sinica.edu.tw); [shwu@gate.sinica.edu.tw](mailto:shwu@gate.sinica.edu.tw)

<sup>1</sup>Institute of Biological Chemistry, Academia Sinica, No. 128 Academia Road Section 2, Nan-Kang, Taipei 115, Taiwan

<sup>†</sup>I-Fan Tu and Tzu-Lung Lin contributed equally to this work.

**The file includes:**

**Figures S1 to S7**

**Table S1**

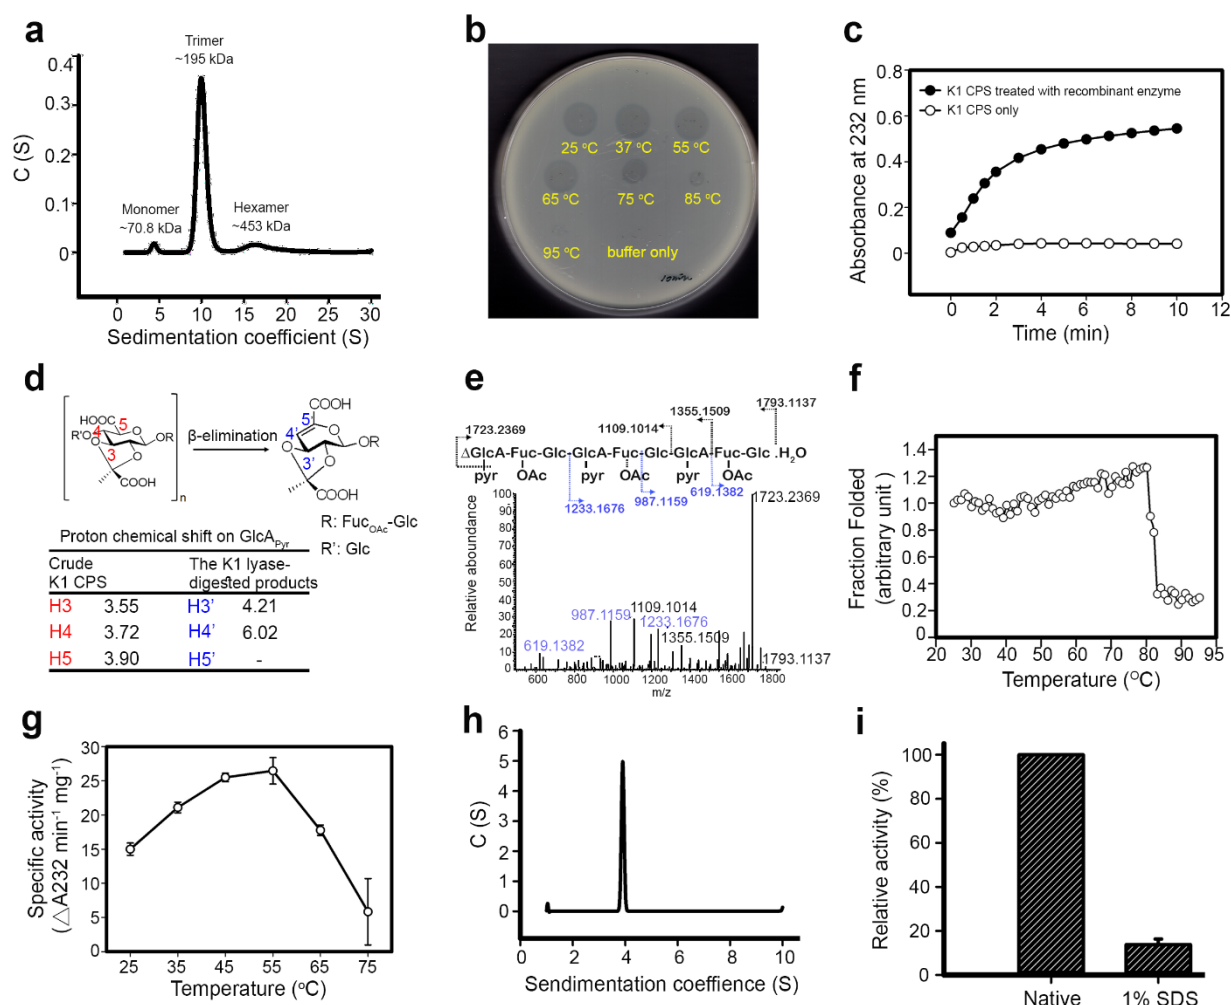

**Fig. S1.** Characterization of recombinant K1 lyase. **a** Assembly of K1 lyase in solution as determined by analytical ultracentrifugation. **b** Top agar assay of K1 lyase after heating at varying temperatures, as indicated, for 5 min. **c** Enzyme activity assay of K1 lyase on the substrate K1 CPS as evaluated by monitoring the elevated UV absorption at 232 nm. **d** Proton chemical shifts on GlcA of K1 CPS after treatment with K1 lyase, as measured by 2D <sup>1</sup>H,<sup>1</sup>H DQF-COSY NMR spectrum. **e** LC-ESI-MS-MS analysis of a K1 lyase-digested product (m/z = 1811.46) of K1 CPS. **f** Thermal stability of K1 lyase as evaluated by circular dichroism spectroscopy. **g** Enzymatic activity of K1 lyase under varying temperatures. The results are shown as mean  $\pm$  SD from triplicate experiments. **h** Dissociation of trimeric K1 lyase into monomers in the presence of 1% SDS as analyzed by analytical ultracentrifugation. **i** Enzymatic activity of K1 lyase in the presence or absence of 1% SDS.

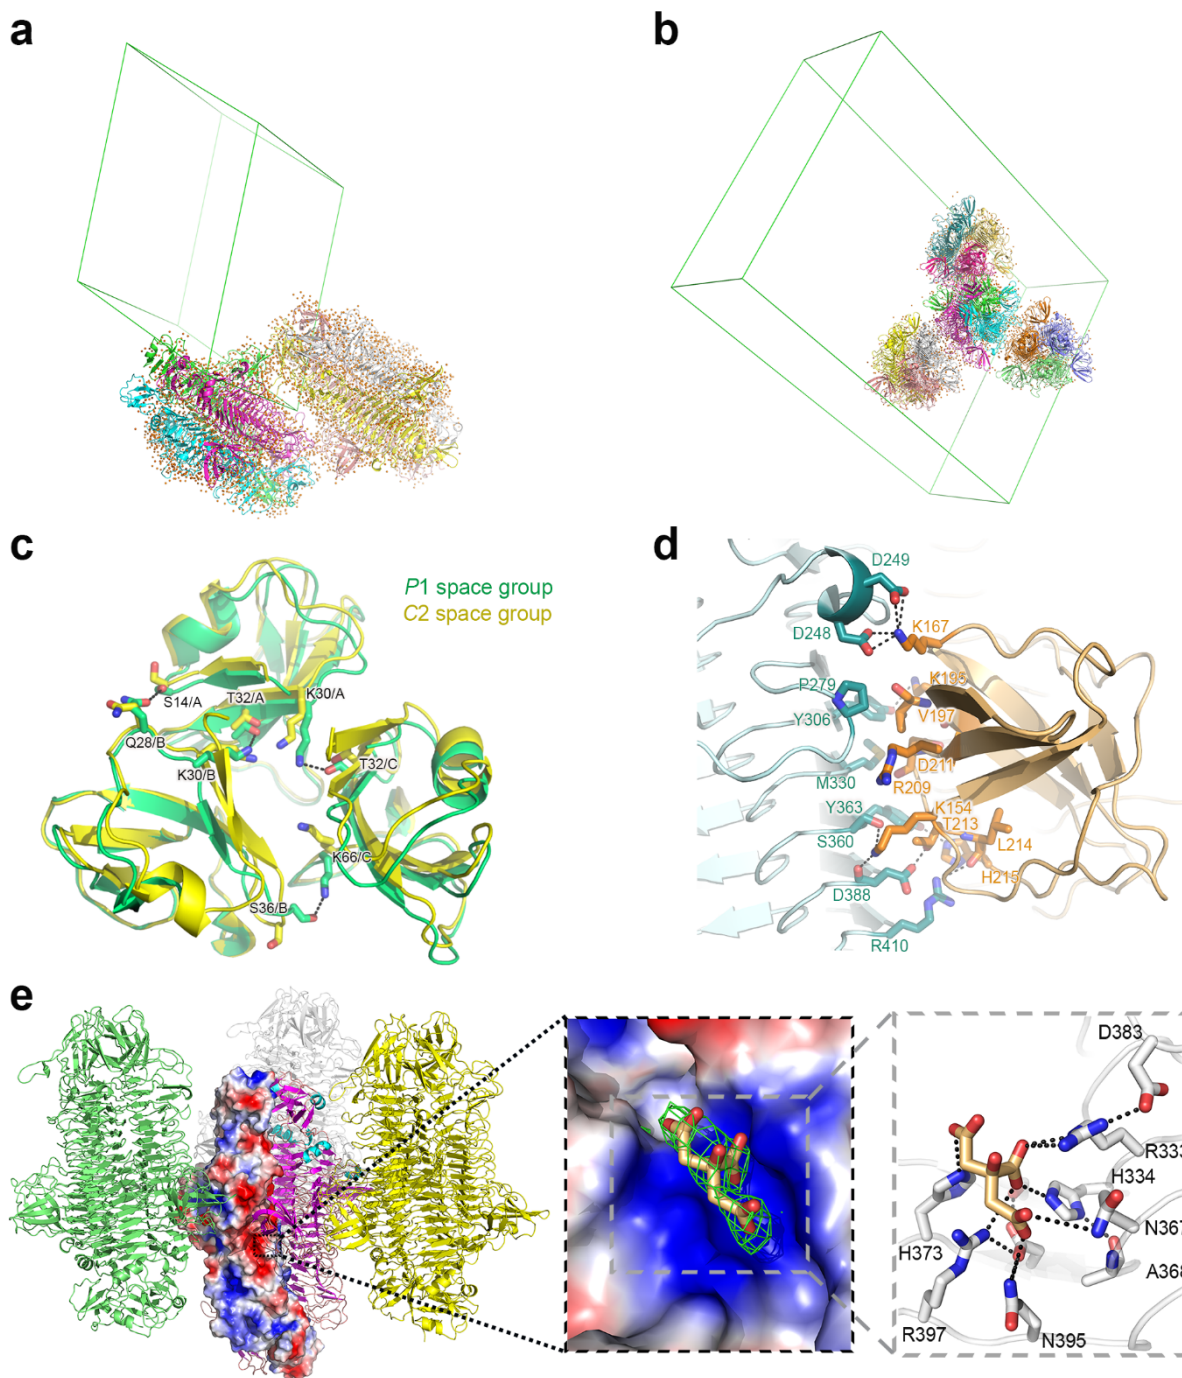

**Fig. S2.** Crystal structure of K1 lyase in the *C2* crystal form. **a** Two K1 lyase trimers in the asymmetric unit of *P1* crystal form. The orange dots represent the solvent molecules. **b** Four K1 lyase trimers in the asymmetric unit of *C2* crystal form. **c** Superimposition of K1 lyase trimers from the two crystal forms. The view from the N-terminal domains with the distinct hydrogen bonds between the two structures being indicated. **d** Interaction of the “rider” domain (orange) with the  $\beta$ -helix of a neighboring subunit (cyan) in the *C2* crystal form. **e** A citrate molecule bound to the catalytic carbohydrate-binding site of K1 lyase in the *C2* crystal form. The detailed interaction and  $1\sigma F_o - F_c$  omit map for the bound citrate are shown.

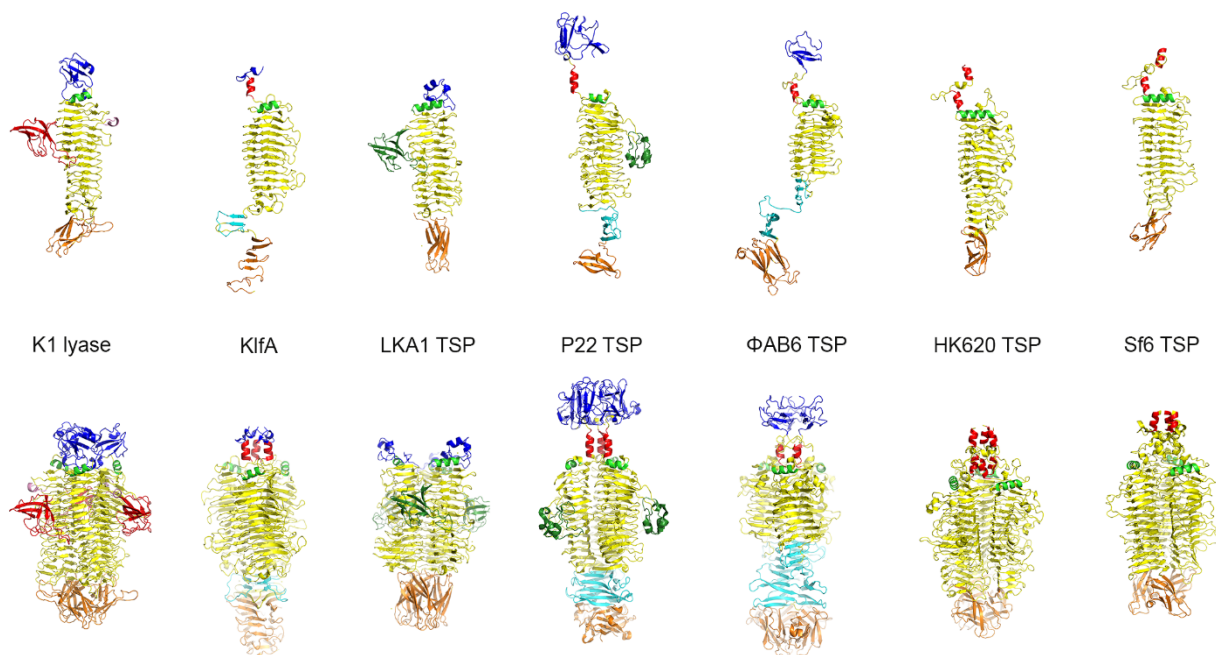

**Fig. S3.** Comparison of the K1 lyase structure described here with some reported structures of bacteriophage-derived CPS depolymerases. K1fA: K5 lyase A<sup>1</sup>. LKA1 TSP: the phage LKA1 TSP with a polysaccharide lyase activity<sup>2</sup>. P22 TSP, ΦAB6 TSP, HK620 TSP and Sf6 TSP: the phage TSP with polysaccharide hydrolase activity from the bacteriophage P22<sup>3</sup>, ΦAB6<sup>4</sup>, HK620<sup>5</sup>, and Sf6<sup>6</sup>, respectively. Upper panel: the monomer. Lower panel: the trimer. The structure colored in blue, yellow and orange represent the N-terminal, β-helix and C-terminal domain, respectively. The helix bundle connecting the N-terminal and β-helix domains is colored red. The “cap” α-helix on the top of β-helix domain is colored green. The strikingly protruding structure at the β-helix of K1 lyase and other TSPs is colored deep red and deep green, respectively. The interdigitated or swapped structures between the β-helix and C-terminal domain are colored cyan.

## References

1. Thompson, J.E.; Pourhossein, M.; Waterhouse, A.; Hudson, T.; Goldrick, M.; Derrick, J.P.; Roberts, I.S. The K5 lyase K1fA combines a viral tail spike structure with a bacterial polysaccharide lyase mechanism. *J. Biol. Chem.* **2010**, *285*, 23963-23969.
2. Olszak T.; Shneider M.M.; Latka A.; Maciejewska B.; Browning C.; Sycheva L.V.; Cornelissen A.; Danis-Wlodarczyk K.; Senchenkova S.N.; Shashkov A.S.; et al. The O-specific polysaccharide lyase from the phage LKA1 tailspike reduces *Pseudomonas* virulence. *Sci. Rep.* **2017**, *7*, 16302.
3. Seul, A.; Müller, J.J.; Andres, D.; Stettner, E.; Heinemann, U.; Seckler, R. Bacteriophage P22 tailspike: structure of the complete protein and function of the interdomain linker. *Acta Crystallogr. D Biol. Crystallogr.* **2014**, *70*, 1336-1345.
4. Lee, I.M.; Tu, I.F.; Yang, F.L.; Ko, T.P.; Liao, J.H.; Lin N.T.; Wu, C.Y.; Ren, C.T.; Wang,

A.H.; Chang, C.M.; et al. Structural basis for fragmenting the exopolysaccharide of *Acinetobacter baumannii* by bacteriophage PhiAB6 tailspike protein. *Sci. Rep.* **2017**, *7*, 42711.

5. Barbirz S.; Muller J.J.; Uetrecht C.; Clark A.J.; Heinemann U.; Seckler R.; Crystal structure of Escherichia coli phage HK620 tailspike: podoviral tailspike endoglycosidase modules are evolutionarily related. *Mol. Microbiol.* **2008**, *69*, 303-316.
6. Muller J.J.; Barbirz S.; Heinle K.; Freiberg A.; Seckler R.; Heinemann U.; An intersubunit active site between supercoiled parallel beta helices in the trimeric tailspike endorhamnosidase of Shigella flexneri Phage Sf6. *Structure.* **2008**, *16*, 766-775.

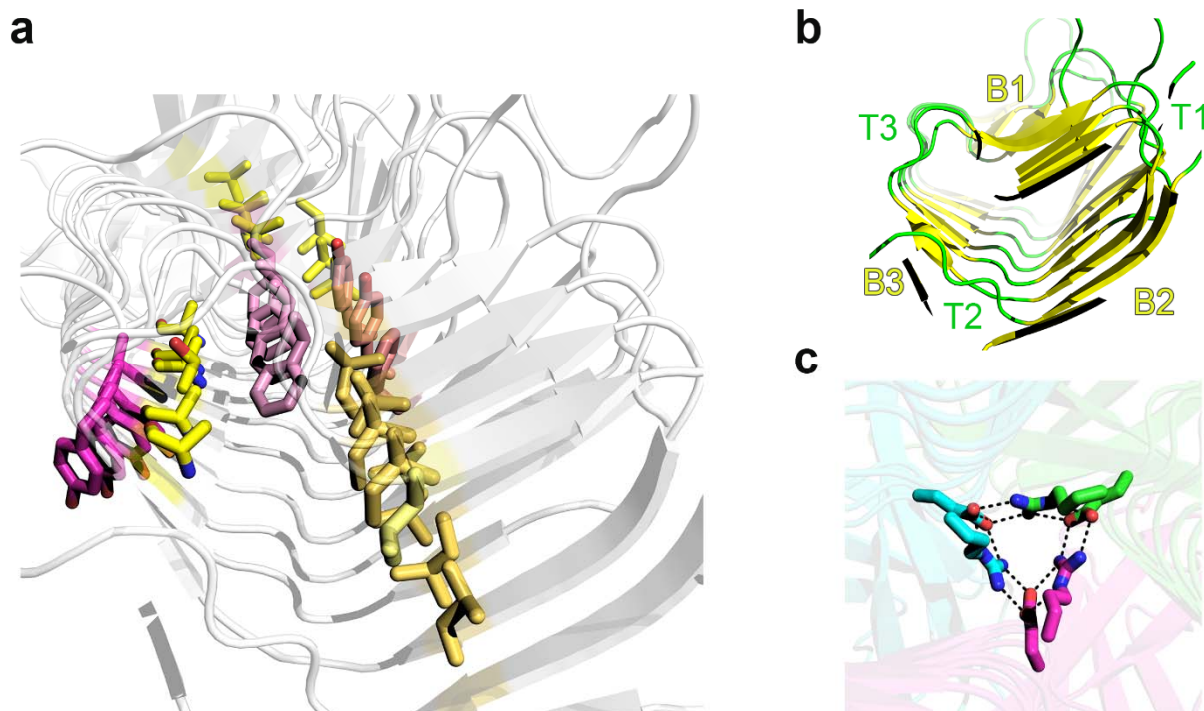

**Fig. S4.** The inward and outward side-chain stacks and the triangular interaction network at the central  $\beta$ -helix of K1 lyase. **a** The inward-facing  $\beta$ -branched stacks of Val, Ile, Leu and Met residues are colored yellow. The aromatic stacks of Phe and Tyr residues are colored purple. The outward-oriented stacks of Tyr and His residues are colored magenta. **b** The central  $\beta$ -helix is collapsed into a kidney-shaped cross section. Individual rung of the  $\beta$ -helix is organized into three strands, B1, B2 and B3, separated by turns T1, T2 and T3. **c** Three pairs of Arg<sup>555</sup> and Glu<sup>596</sup>, each from a different subunit, form three inter-chain salt bridges and three intra-chain hydrogen bonds, which constitute the triangular interaction network near the C-terminal end of  $\beta$ -helix.

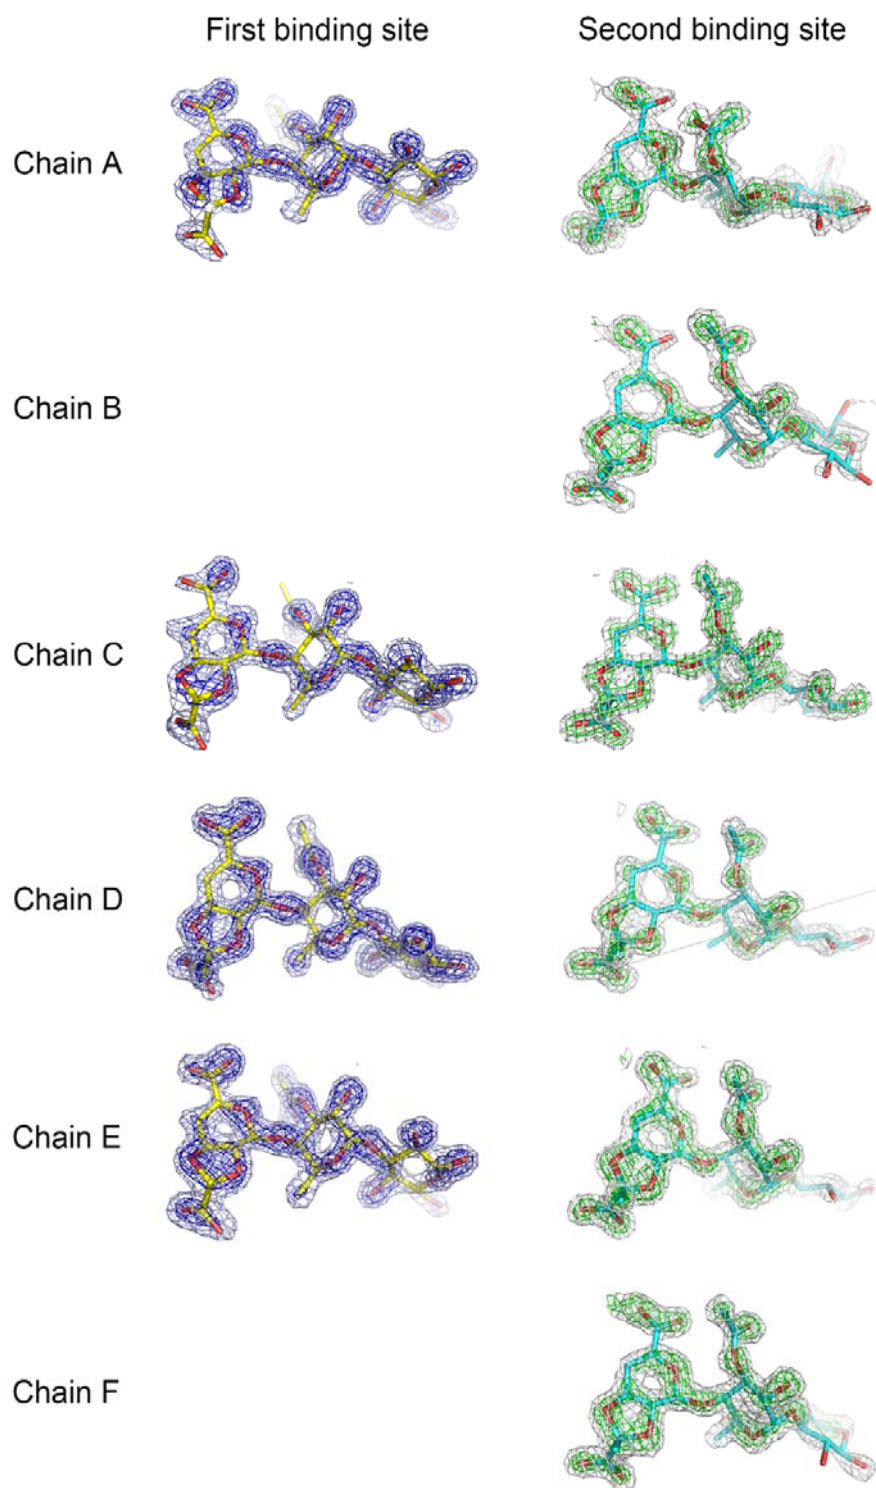

**Fig. S5.** The  $2F_o - F_c$  omit maps for the bound trisaccharides [2,3-(*S*)-pyruvate]- $\beta$ -D- $\Delta$ 4,5-GlcpA-(1 $\rightarrow$ 4)-*O*-acetyl- $\alpha$ -L-Fucp-(1 $\rightarrow$ 3)- $\beta$ -D-Glcp at the first (or catalytic) and second (or non-catalytic) binding sites. The stick models of the trisaccharides at the first and second binding site are colored yellow and cyan, respectively. The electron density maps contoured at  $2.0\sigma$  are colored gray and  $3.0\sigma$  colored blue or green.

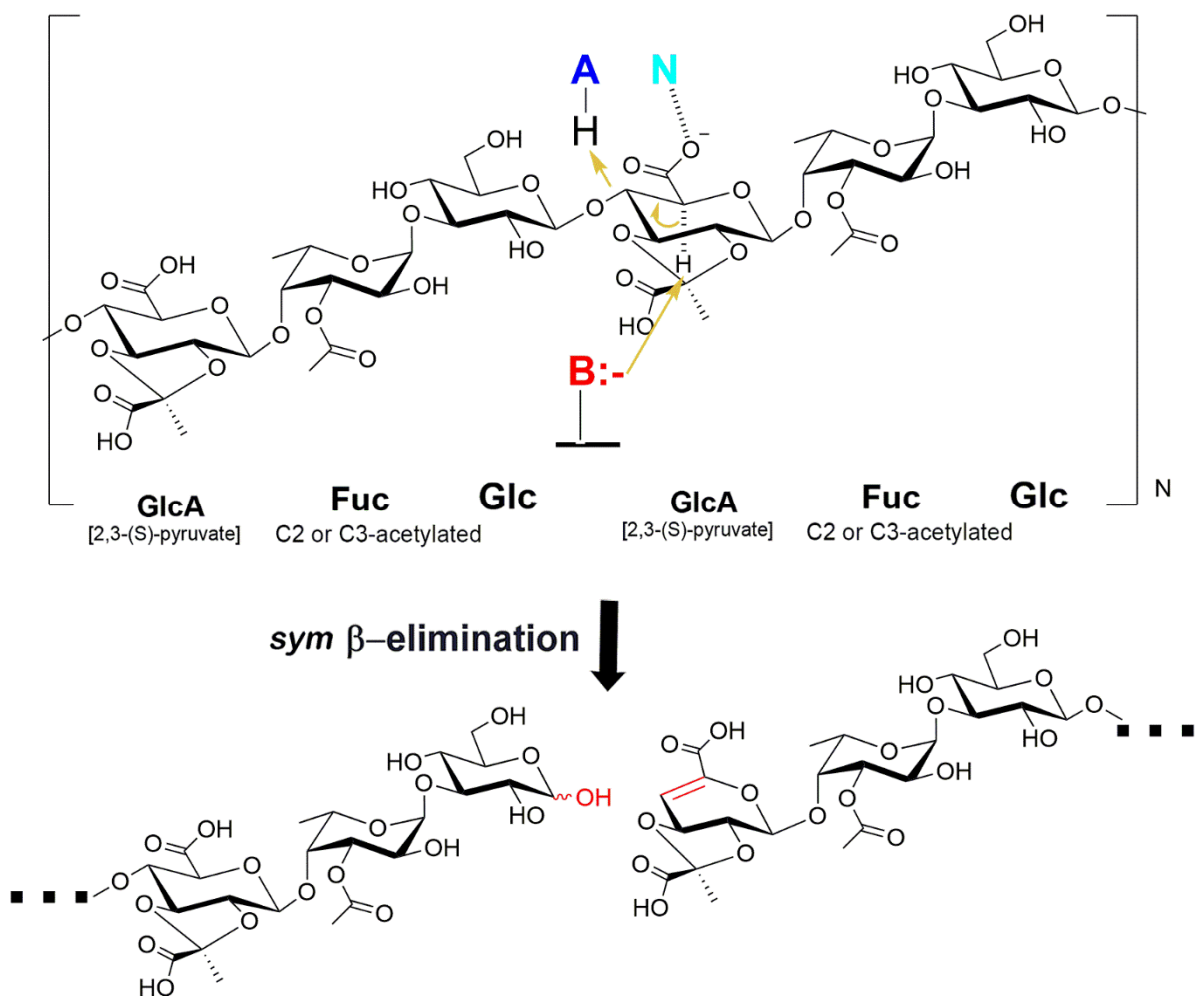

**Fig. S6.** Schematic illustration of the *sym*  $\beta$ -elimination reaction catalyzed by K1 lyase. Abbreviations: B, the Brønsted base; A, the Brønsted acid; N, the neutralizer.



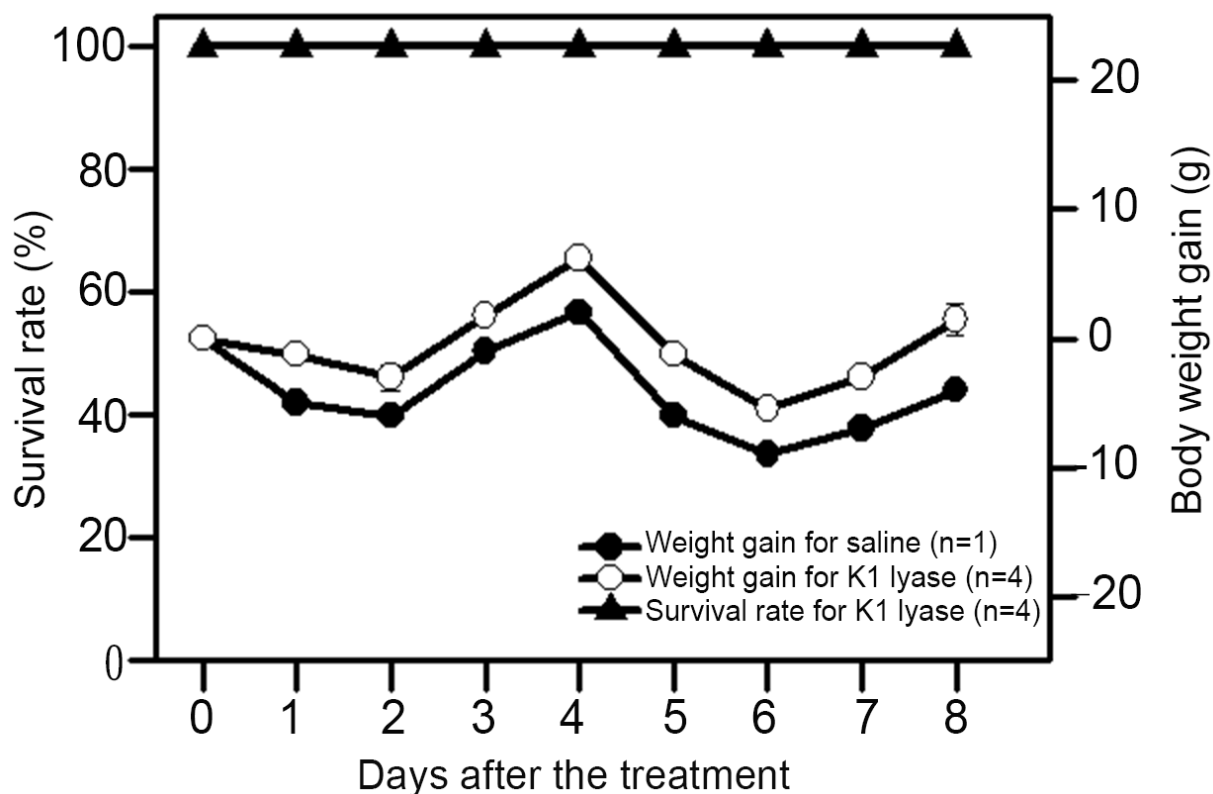

**Fig. S7.** Effect of high-dose K1 lyase on the survival rate and body weight of mice. Four 5-week-old female BALB/cBy1 mice were administrated intraperitoneally with K1 lyase at the dose of 100  $\mu\text{g}$  per mouse and the survival rate and body weight gain were monitored for 8 days. A mouse injected with phosphate-buffered saline served as the control for body weight. The results of the K1 lyase treatments are shown as average  $\pm$  SD.

**Table S1.** The dihedral angles ( $\Phi$ ,  $\psi$ ) of glycosidic linkages of the bound trisaccharides at the catalytic and non-catalytic binding sites of K1 lyase

| Glycosidic linkage | <b>GlcA-(<math>\beta</math>1<math>\rightarrow</math>4)-Fuc</b> |                 | <b>Fuc-(<math>\alpha</math>1<math>\rightarrow</math>3)-Glc</b> |                 |
|--------------------|----------------------------------------------------------------|-----------------|----------------------------------------------------------------|-----------------|
|                    | $\Phi$                                                         | $\psi$          | $\Phi$                                                         | $\psi$          |
| Catalytic site     | $-97.6 \pm 2.7$                                                | $115.6 \pm 0.7$ | $-70.8 \pm 0.7$                                                | $-92.0 \pm 1.0$ |
| Non-catalytic site | $-58.0 \pm 2.1$                                                | $127.3 \pm 0.6$ | $-74.0 \pm 8.4$                                                | $-92.7 \pm 9.7$ |
